# Supplementary material
Source: Springer Nature journal article supplement (https://www.springermedizin.de/resource/supplementary/12881_2010_797_MOESM3_ESM.pdf/9451434)

# Chromosome 22

# Microdeletion types

# qPCR markers

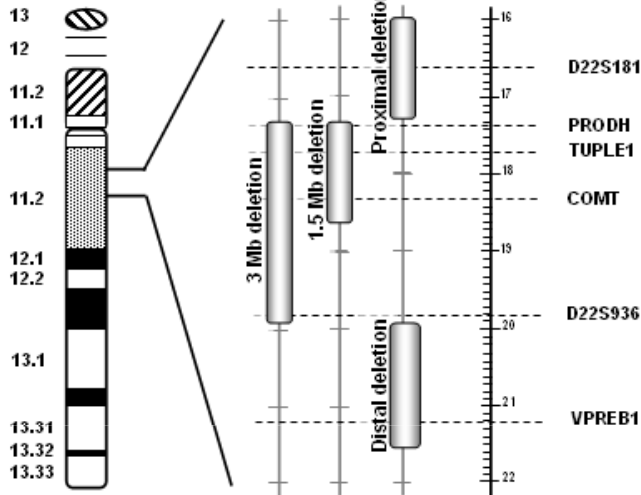

Supplement: MOESM3 [file 9451434]
